# Supplementary material for: Enhancing reproducibility in single cell research with biocytometry: An inter-laboratory study
Source: PubMed Central journal article supplement (PMC11627387; doi:10.1371/journal.pone.0314992), 2024-12-09
Supplement: pone.0314992.s011.pdf [file pone.0314992.s011.pdf]

# Histograms

SNRT values were further visualized using a smooth histogram in Fig 2B. The histogram was smoothed with a gaussian kernel.
